# Supplementary material for: Decreasing Incidence and Mortality in Traumatic Brain Injury in Korea, 2008–2017: A Population-Based Longitudinal Study
Source: PubMed Central journal article supplement (PMC7504501; doi:10.3390/ijerph17176197), 2020-08-26
Supplement: ijerph-17-06197-s001.pdf [file ijerph-17-06197-s001.pdf]

**Table S1.** Odds ratios from a comparison of the participants with traumatic brain injury (TBI) and individuals without TBI (age  $\geq 70$  years) from the general population.

| Year       | 2008 | 2009 | 2010 | 2011 | 2012 | 2013 | 2014 | 2015 | 2016 | 2017 |
|------------|------|------|------|------|------|------|------|------|------|------|
| Odds ratio | 26.9 | 25.3 | 20.1 | 17.8 | 14.2 | 12.6 | 10.7 | 8.6  | 6.5  | 4.4  |

**Table S2.** The crude incidence and mortality rates of participants in the 0–4 and 5–9 years groups.

| Year                 | Age | 2008   | 2009   | 2010   | 2011   | 2012   | 2013   | 2014   | 2015   | 2016   | 2017   | <i>p</i> for Trend |
|----------------------|-----|--------|--------|--------|--------|--------|--------|--------|--------|--------|--------|--------------------|
| Crude incidence rate | 0–4 | 1818.8 | 1920.8 | 1921.5 | 1788.0 | 1738.5 | 1677.0 | 1487.5 | 1344.6 | 1353.4 | 1308.5 | <0.001             |
|                      | 5–9 | 839.1  | 887.0  | 913.1  | 882.8  | 877.8  | 843.1  | 792.6  | 734.8  | 710.0  | 716.8  | <0.001             |
| Crude mortality rate | 0–4 | 3.6    | 3.8    | 2.9    | 2.6    | 2.2    | 2.4    | 2.2    | 1.4    | 1.6    | 1.1    | 0.055              |
|                      | 5–9 | 1.6    | 1.9    | 1.4    | 1.1    | 1.1    | 0.7    | 0.6    | 0.3    | 0.7    | 0.4    | 0.099              |

**Table S3.** The stratification of the crude incidence rate based on the diagnosis of the type of traumatic brain injury.

| Year                | Age | 2008   | 2009   | 2010   | 2011   | 2012   | 2013   | 2014   | 2015   | 2016   | 2017   | <i>p</i> for Trend |
|---------------------|-----|--------|--------|--------|--------|--------|--------|--------|--------|--------|--------|--------------------|
| Concussion          | 0–4 | 1538.8 | 1662.2 | 1683.5 | 1568.2 | 1553.9 | 1490.7 | 1324.5 | 1218.0 | 1234.8 | 1202.4 | <0.001             |
|                     | 5–9 | 716.5  | 770.0  | 810.0  | 782.6  | 793.9  | 765.6  | 720.8  | 678.1  | 653.7  | 665.7  | <0.001             |
| Intracranial injury | 0–4 | 293.8  | 272.9  | 257.3  | 223.4  | 183.1  | 185.3  | 157.7  | 132.4  | 129.7  | 114.1  | <0.001             |
|                     | 5–9 | 137.4  | 132.0  | 119.7  | 110.5  | 92.9   | 86.1   | 76.2   | 66.5   | 70.2   | 65.5   | <0.001             |
